# Supplementary material for: Causes of male infertility: a 9-year prospective monocentre study on 1737 patients with reduced total sperm counts
Source: PubMed Central journal article supplement — Hum Reprod. 2016 Dec 16;32(1):18–31. doi: 10.1093/humrep/dew284 (PMC5165077; doi:10.1093/humrep/dew284), 2016-12-16
Supplement: supp_dew284_dew284suppl_table1.pdf [file supp_dew284_dew284suppl_table1.pdf]

**Supplementary Table S1** Proportion of semen analysis and genotyping of Y-chromosomal microdeletions performed at the Andrology Centre, Tartu University Hospital (AC-TUH) from all respective analysis in Estonia during the study period.

| Year                                  | 2005  | 2006  | 2007  | 2008  | 2009  | 2010  | 2011  | 2012  | 2013  | Total  |
|---------------------------------------|-------|-------|-------|-------|-------|-------|-------|-------|-------|--------|
| Semen analysis <sup>a</sup>           |       |       |       |       |       |       |       |       |       |        |
| Total in Estonia (n)                  | 3535  | 4838  | 5512  | 6076  | 4955  | 4852  | 5309  | 6075  | 6393  | 47 545 |
| AC-TUH (n)                            | 2561  | 3920  | 4408  | 4723  | 3907  | 3808  | 3909  | 4099  | 4213  | 35 548 |
| Proportion of AC-TUH (%)              | 72.4% | 81.0% | 80.0% | 77.7% | 78.8% | 78.5% | 73.6% | 67.5% | 65.9% | 74.8%  |
| Y microdeletion analysis <sup>a</sup> |       |       |       |       |       |       |       |       |       |        |
| Total in Estonia (n)                  | 156   | 131   | 140   | 122   | 137   | 123   | 112   | 146   | 164   | 1231   |
| AC-TUH (n)                            | 146   | 125   | 133   | 116   | 124   | 120   | 106   | 138   | 155   | 1163   |
| Proportion of AC-TUH (%)              | 93.6% | 95.4% | 95.0% | 95.1% | 90.5% | 97.6% | 94.6% | 94.5% | 94.5% | 94.5%  |

<sup>a</sup>Data for the analyses covered by Estonian Health Insurance Fund, which is the only organization in Estonia dealing with compulsory health insurance.
